# Supplementary material for: Integrated sonication-assisted deep eutectic solvent for extraction of antibacterial compounds from cacao shells
Source: Royal Society of Chemistry journal article supplement (doi:10.1039/d6ra01724j), 2026-04-16
Supplement: d6ra01724j1.pdf [file d6ra01724j1.pdf]

## Integrated Sonication-assisted Deep Eutectic Solvent for Antibacterial Compounds

### Extraction from Cacao Shells

#### Supplementary Information (SI)

Yuni Kusumastuti<sup>a,b\*</sup>, Jordan Maulana Ma'arif<sup>b</sup>, Muh. Irsal<sup>b</sup>, Dewanti Cahya Widi<sup>b,c</sup>,  
Nur Rofiqoh Eviana Putri<sup>a,b</sup>, Mukmin Sapto Pamungkas<sup>a,b</sup>, Lusiana Olivia<sup>b</sup>, and Jonas  
Kristanto<sup>a</sup>

<sup>a</sup> Chemical Engineering Department, Faculty of Engineering, Universitas Gadjah Mada, Jalan  
Grafika 2, Yogyakarta 55284, Indonesia

<sup>b</sup> Smart Biomaterial Research Group, Chemical Engineering Department, Faculty of  
Engineering, Universitas Gadjah Mada, Jalan Grafika 2, Yogyakarta 55284, Indonesia

<sup>c</sup> Agrotropica Learning Center, Faculty of Agriculture, Universitas Gadjah Mada, Jalan Flora,  
Yogyakarta 55281, Indonesia

Email: [yuni\\_kusumastuti@ugm.ac.id](mailto:yuni_kusumastuti@ugm.ac.id)

**Table S1.** Statistical validation model fitness

| Source              | Sequential <i>p</i> -value | Lack of Fit <i>p</i> -value | Adjusted R <sup>2</sup> | Predicted R <sup>2</sup> | Remarks   |
|---------------------|----------------------------|-----------------------------|-------------------------|--------------------------|-----------|
| <b>Yield of TPC</b> |                            |                             |                         |                          |           |
| Linear              | < 0.0001                   | 0.0692                      | 0.8458                  | 0.7449                   |           |
| 2FI                 | 0.6984                     | 0.0551                      | 0.8210                  | 0.4735                   |           |
| Quadratic           | 0.0176                     | 0.1780                      | 0.9562                  | 0.7761                   | Suggested |
| Cubic               | 0.1780                     |                             | 0.9866                  |                          | Aliased   |
| <b>Yield of TFC</b> |                            |                             |                         |                          |           |
| Linear              | 0.0028                     | 0.0555                      | 0.6287                  | 0.3889                   |           |
| 2FI                 | 0.6176                     | 0.0460                      | 0.5866                  | -0.2002                  |           |
| Quadratic           | 0.0005                     | 0.5881                      | 0.9769                  | 0.9187                   | Suggested |
| Cubic               | 0.5881                     |                             | 0.9742                  |                          | Aliased   |

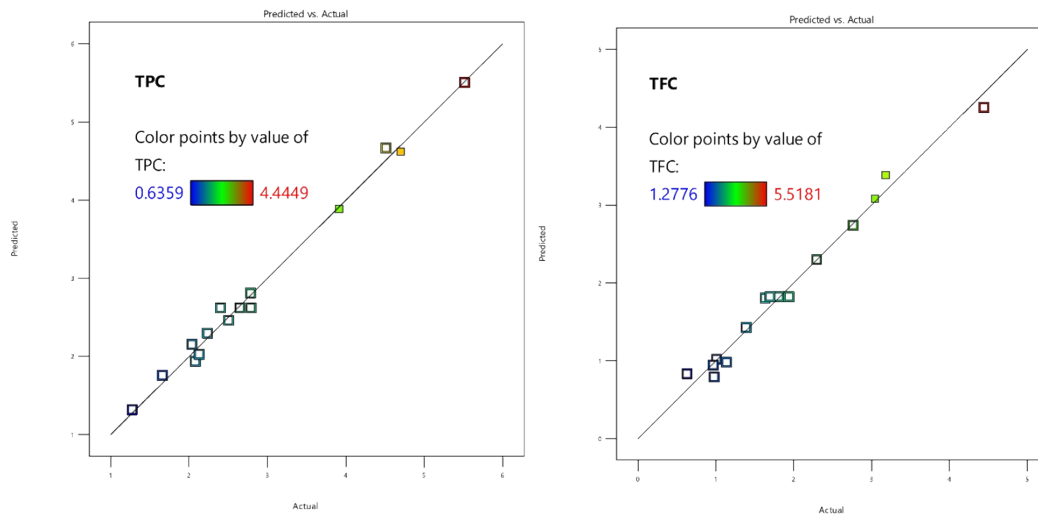

**Fig. S1.** Predictive performance of the regression model for TPC and TFC responses.

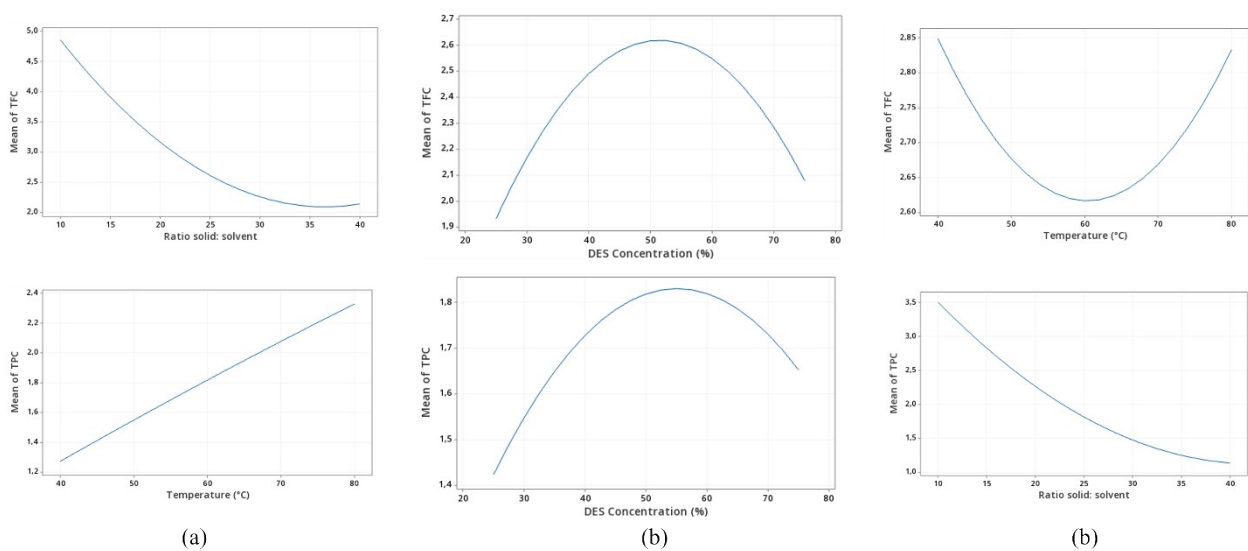

**Fig. S2.** Effect of individual extraction parameters on total phenolic content (TPC) and total flavonoid content (TFC). (A) Extraction time (min); (B) Temperature (°C); (C) DES concentration (%).

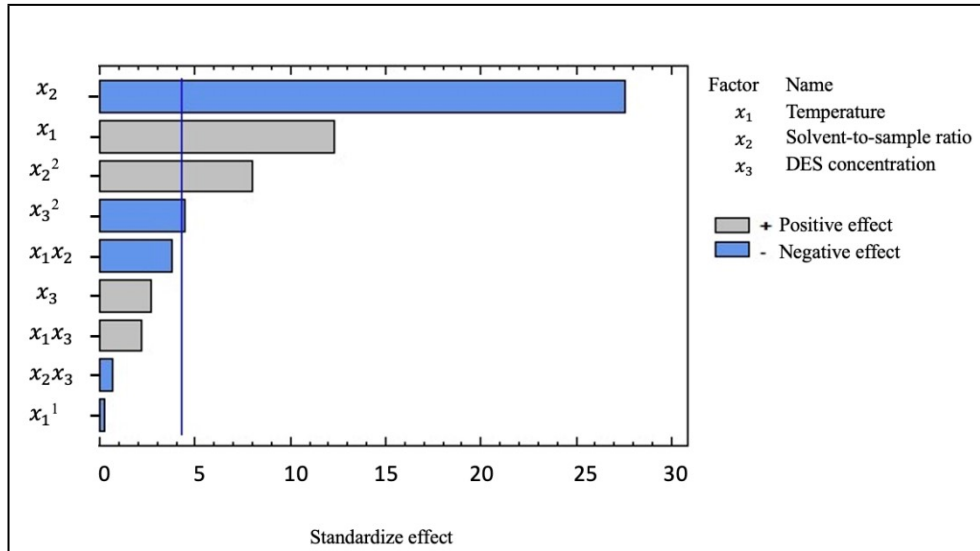

(a)

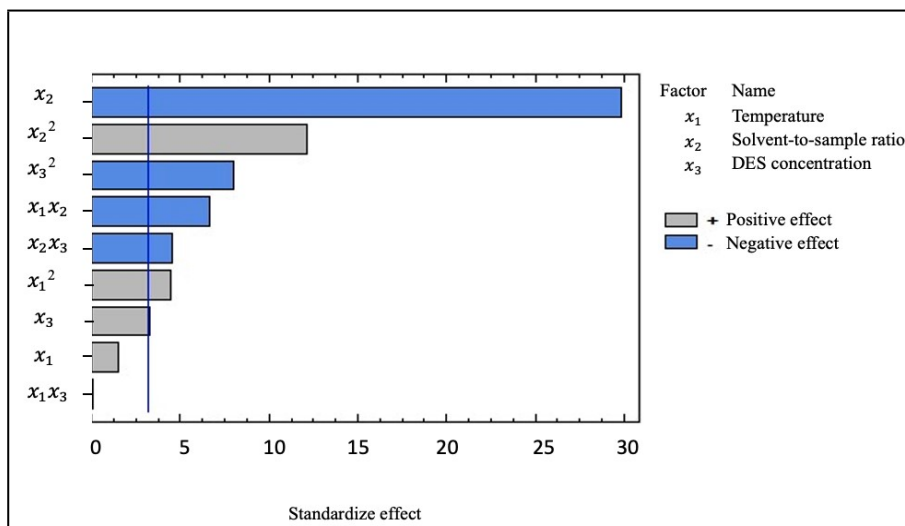

(b)

**Fig. S3.** The main, interaction, and quadratic effects of the UAE variables on TPC levels (a) and TFC levels in the extracts (b). The blue line across the bars demonstrates that the corresponding factor has a positive (grey) or negative (blue) impact ( $p < 0.05$ ).
